# Supplementary material for: Zebra finches identify individuals using vocal signatures unique to each call type
Source: PubMed Central journal article supplement (PMC6168511; doi:10.1038/s41467-018-06394-9), 2018-10-02
Supplement: 41467_2018_6394_MOESM3_ESM.pdf [file 41467_2018_6394_MOESM3_ESM.pdf]

### **Description of Additional Supplementary Files:**

Supplementary Movie 1. Female subject performing the single-call-type test on Distance calls from 2 males.

Supplementary Audio 1. **Wsst calls from Bird 1 and Bird 2.** The first 3 renditions are from Bird 1 and the last 3 from Bird 2.

Supplementary Audio 2. **Distance calls from Bird 1 and Bird 2.** The first 3 renditions are from Bird 1 and the last 3 from Bird 2.
